# Supplementary material
Source: PubMed Central journal article supplement (PMC2651291)
Supplement: 0810473106_0810473106SI.pdf [file 0810473106_0810473106SI.pdf]

# Supporting Information

Sfanos *et al.* 10.1073/pnas.0810473106

## SI Materials and Methods

**Collection of Prostatic Corpora Amylacea and Calculi.** Grossly visible PC were collected with sterile forceps during tissue processing for surgical pathology. CA were collected by fine-needle aspiration of the prostate into sterile 1X PBS. The aspirated material (which included both CA and prostate-derived cells) then was passed through a 100- $\mu\text{m}$  nylon mesh strainer. The CA remaining in the mesh filter were collected for further processing. All CA and PC specimens for protein analysis were washed once in 1X PBS, incubated at room temperature in 1X PBS with 0.1% SDS (to wash away any cellular debris on the outer surface) for 1 h, washed twice with 1X PBS, and then stored at 4 °C until protein extraction. CA/PC collected for infrared spectroscopy were stored at -20 °C until they were sent for analysis.

**Processing Excised Gel Bands for In-Gel LC/MS/MS Analyses.** SDS PAGE gels were transferred to a sterile Petri dish, and gel bands of interest were excised with a sterile scalpel. A control gel band excised from a lane containing only sample loading buffer was included for each band analyzed to control for contamination. Excised bands were placed in a microcentrifuge tube that had been rinsed with HPLC-grade methanol. Bands were washed twice in 50% HPLC-grade methanol for 10 min, then all liquid was removed, and samples were stored at -20 °C until they were submitted for mass spectrometry analysis.

**Mass Spectrometry Analyses.** Proteins in solution were reduced and alkylated with iodacetamide and proteolyzed with sequencing-grade modified porcine trypsin (Promega). Proteins in gel bands were proteolyzed with trypsin (Promega) as described previously (1). Protein identification by LC/MS/MS analysis of peptides was performed using an LTQ ion trap mass spectrometer (Thermo Fisher Scientific) or a QSTAR/Pulsar mass spectrometer (Applied Biosystems/MDX Sciex) interfaced with a 2D nanoLC system (Eksigent). Peptides were fractionated by reverse-phase HPLC on a 75- $\mu\text{m}$   $\times$  100-mm C18 column with a 10- $\mu\text{m}$  emitter using a 0%–60% acetonitrile/0.5% formic acid gradient over 30 min at 300 nl/min. Peptide sequences were identified using Mascot software ([www.matrixscience.com](http://www.matrixscience.com)) to

search the National Center for Biotechnology Information non-redundant database with acquired fragmentation data. Identified sequences were confirmed by manually inspecting fragmentation spectra.

**Positive Controls for Western Blot Analyses.** Positive controls for Western blot analyses included purified human milk and neutrophil lactoferrin (Sigma L0520 and L6793, respectively). Peripheral blood white blood cells were prepared from 8 ml of whole peripheral blood after lysis of red blood cells with ACK lysis buffer (Quality Biological, Inc.). Prostate tissue biopsies (peripheral zone) were obtained from a radical prostatectomy specimen and stored at -20 °C until protein extraction. White blood cell, prostate tissue, and cell line protein extracts (LNCaP, PC3, fibroblasts) were processed in an identical manner as follows: cells were washed twice with 1X PBS and then re-suspended in RIPA buffer (50 mM Tris-HCl pH 8.0, 150 mM NaCl, 1% Triton X-100, 0.5% Na-Deoxycholate, 0.1% SDS, 1 mM EDTA) with 1X HALT Protease Inhibitor Mixture (Pierce). Samples were allowed to solubilize for 30 min. at 4 °C and then were sonicated briefly. The resulting lysate was centrifuged at 16,000  $\times g$  for 5 min, the supernatant was removed, and protein was quantitated using the standard bicinchoninic acid (BCA) assay (Pierce). Prostatic fluid from a radical prostatectomy specimen was diluted in 1X PBS with 1X HALT Protease Inhibitor Mixture, and protein was quantified by BCA assay.

**Immunohistochemistry.** Slides containing sections of FFPE prostate tissue were steamed for 20 min in citrate-based unmasking solution for antigen retrieval (Vector Laboratories) (for lactoferrin staining) or treated with protease (Subtilisin, Sigma 82490) at a concentration of 1 mg/ml for 7 min at room temperature (for calprotectin staining). Slides were incubated with either the same anti-human lactoferrin antibody used for Western blotting (Sigma, catalog # L3262) at 1:2000 or with monoclonal mouse anti-human calprotectin (Dako, MAC 387, catalog #M0747) (2) at 1:300. Staining was visualized using 3,3'-Diamino-benzidine (Sigma FAST 3,3'-Diamino-benzidine tablets), and slides were counterstained with hematoxylin.

1. Shevchenko A, Wilm M, Vorm O, Mann M (1996) Mass spectrometric sequencing of proteins silver-stained polyacrylamide gels. *Anal Chem* 68:850–858.

2. Goebeler M, Roth J, Teigelkamp S, Sorg C (1994) The monoclonal antibody MAC387 detects an epitope on the calcium-binding protein MRP14. *J Leukocyte Biol* 55:259–261.

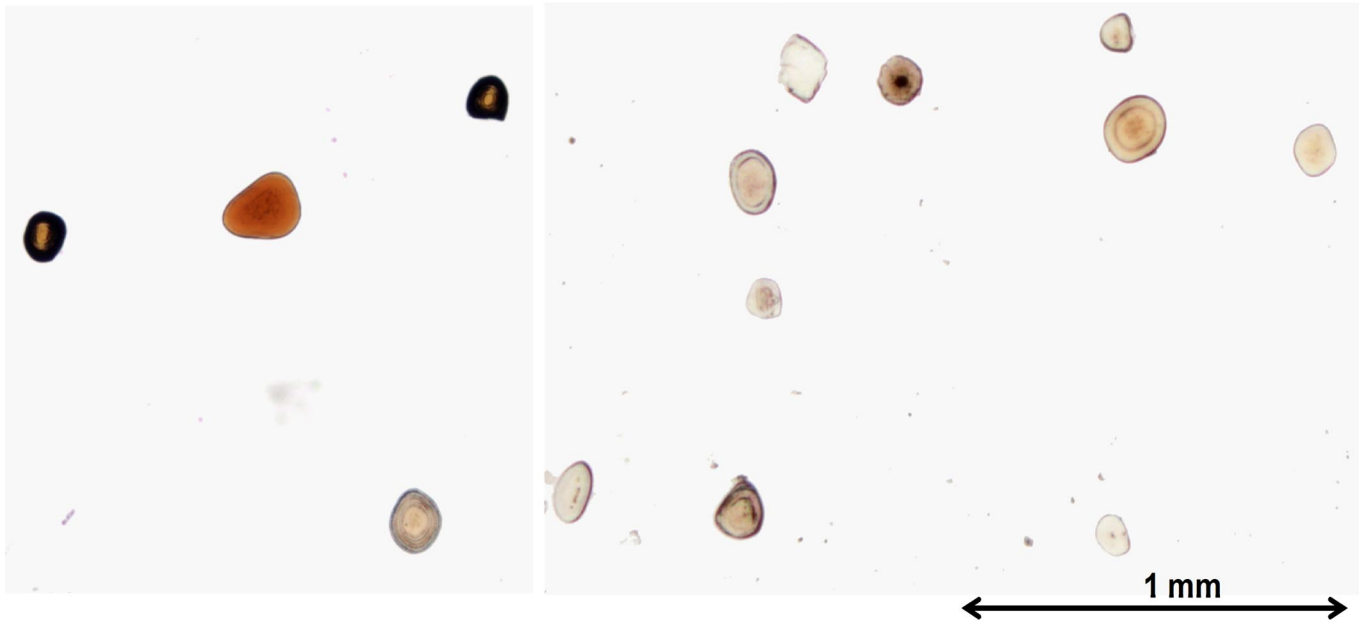

Fig. S1. Examples of isolated corpora amylacea submitted for infrared spectroscopy analyses.

**Table S1. Characteristics and disease associations of non-prostatic corpora amylacea (CA) and calculi in humans**

| Organ System                                                     | Composition                                                                                                               | Disease Association(s)                                                                                                       | Size            | Frequency <sup>a</sup>                                                                                        |
|------------------------------------------------------------------|---------------------------------------------------------------------------------------------------------------------------|------------------------------------------------------------------------------------------------------------------------------|-----------------|---------------------------------------------------------------------------------------------------------------|
| Corpora amylacea                                                 |                                                                                                                           |                                                                                                                              |                 |                                                                                                               |
| Central nervous system <sup>(1)</sup> ; optic nerve, retina (CA) | Polyglucosan; (87.9% hexose) <sup>(2)</sup> /stress proteins; AGEs <sup>b</sup> ; S100 proteins (brain CA) <sup>(3)</sup> | Neurodegeneration (Lafora body disease, adult polyglucosan disease, Bielschowsky body disease) <sup>(1)</sup>                | 2–20 μM         | Common; up to 100% postpuberty (central nervous system) <sup>(1)</sup>                                        |
| Cervix (CA <sup>(4)</sup> /psammoma body <sup>(5)</sup> )        | Calcium/unknown                                                                                                           | Associated with gynecological (cervical, ovarian, uterine) malignancies, particularly in postmenopausal women <sup>(5)</sup> | Variable        | Rare (< 0.1%) <sup>(6)</sup>                                                                                  |
| Heart (CA) <sup>(1)</sup> /basophilic degeneration               | Polyglucosan <sup>(7)</sup>                                                                                               | Unknown                                                                                                                      | 2–20 μM         | Common, up to 100% post 60 years of age <sup>(7)</sup>                                                        |
| Lung (CA)                                                        | β2-microglobulin <sup>(8)</sup> ; polysaccharide <sup>(9)</sup> ; surfactant apoprotein <sup>(10)</sup>                   | Unknown                                                                                                                      | 30–200 μM       | Rare (3.8%) <sup>(9)</sup>                                                                                    |
| Thyroid (CA) <sup>(1)</sup> /psammoma body)                      | Calcium/unknown                                                                                                           | Associated with papillary thyroid carcinoma <sup>(11)</sup>                                                                  | 20 μM           | Rare in normal thyroid (0.05%–1.6%), large increase in papillary thyroid carcinoma (~ 60%) <sup>(12–16)</sup> |
| Uterus <sup>(8)</sup> (CA)                                       | Unknown                                                                                                                   | Unknown                                                                                                                      | Variable        | Up to 22% in the elderly <sup>(8)</sup>                                                                       |
| Bladder stone                                                    | Calcium oxalate/calcium phosphate <sup>(17)</sup> /neutrophil-related proteins <sup>(18)</sup>                            | Urachal carcinoma <sup>(17)</sup> ; schistosomiasis                                                                          | Variable        | Infrequent <sup>(19)</sup>                                                                                    |
| Breast (Microcalcifications)                                     | Apatite/calcite/oxalate <sup>(20)</sup>                                                                                   | May be indicative of ductal carcinoma in situ <sup>(21)</sup>                                                                | Variable        | 26%–43% <sup>(21, 22)</sup>                                                                                   |
| Gallbladder stone                                                | Cholesterol/cholesterol hydrates/calcium carbonates <sup>(23)</sup>                                                       | Biliary dysfunction                                                                                                          | Variable        | 10%–15% <sup>(24)</sup>                                                                                       |
| Kidney stone                                                     | Calcium oxalate/apatite <sup>(25)</sup> /neutrophil-related proteins <sup>(26)</sup>                                      | Urinary dysfunction                                                                                                          | Highly variable | 10%–15% <sup>(27)</sup>                                                                                       |
| Lung (pulmonary alveolar microlithiasis)                         | Calcium phosphate <sup>(28)</sup>                                                                                         | Hereditary pulmonary alveolar microlithiasis                                                                                 | ≥ 50 μM         | Very rare <sup>(29)</sup>                                                                                     |
| Pancreatic stone                                                 | Calcium carbonate/ lithostathine (pancreatic stone protein), Lactoferrin <sup>(30)</sup>                                  | Pancreatitis; associated with pancreas carcinoma <sup>(31, 32)</sup>                                                         | Variable        | Very rare <sup>(31)</sup>                                                                                     |
| Salivary gland (sialolithiasis)                                  | Hydroxyapatite <sup>(33)</sup>                                                                                            | Sialolithiasis                                                                                                               | 1–55 mm         | 1% at autopsy <sup>(33)</sup>                                                                                 |
| Testicles (microlithiasis)                                       | Hydroxyapatite/collagen <sup>(34)</sup>                                                                                   | Testicular malignancy <sup>(35)</sup>                                                                                        | 20 μM           | 0.6%–9% <sup>(36)</sup>                                                                                       |

Note: This table does not include deposits associated with systemic amyloidosis. Please see refs. 37, and 38 for a good review of those disorders.

<sup>a</sup>Frequency reported as estimated % of individuals in the population.

<sup>b</sup>Advanced glycation end-product.

- Cavanagh JB (1999) Corpora-amylacea and the family of polyglucosan diseases. *Brain Research. Brain Research Reviews* 29:265–295.
- Sakai M, Austin J, Witmer F, Trueb L (1969) Studies of corpora amylacea. I. Isolation and preliminary characterization by chemical and histochemical techniques. *Arch Neurol (Chicago)* 21:526–544.
- Hoyaux D, et al. (2000) S100 proteins in corpora amylacea from normal human brain. *Brain Res* 867:280–288.
- Martinez Giron R (2004) Corpora amylacea in cervicovaginal smears. *Diagn Cytopathology* 31:68–69.
- Nicklin JL, Perrin L, Obermair A, McConachie I, Cominos D (2001) The significance of psammoma bodies on cervical cytology smears. *Gynecol Oncol* 83:6–9.
- Zreik TG, Rutherford TJ (2001) Psammoma bodies in cervicovaginal smears. *Obstetrics and Gynecology* 97:693–695.
- Tamura S, Takahashi M, Kawamura S, Ishihara T (1995) Basophilic degeneration of the myocardium: Histological, immunohistochemical and immuno-electronmicroscopic studies. *Histopathology* 26:501–508.
- Rocken C, Linke RP, Saeger W (1996) Corpora amylacea in the lung, prostate and uterus. A comparative and immunohistochemical study. *Pathology, Research and Practice* 192:998–1006.
- L. Michaels CL (1957) Pulmonary corpora amylacea. *Journal of Pathology and Bacteriology* 74:49–56.
- Akino T, et al. (1990) Pulmonary corpora amylacea contain surfactant apoprotein. *Pathology, Research and Practice* 186:687–691; discussion 691–685.
- Ellison E, Lapuerta P, Martin SE (1998) Psammoma bodies in fine-needle aspirates of the thyroid. *Cancer Cytopathol* 84:169–175.
- Klinck GH, Winship T (1959) Psammoma bodies and thyroid cancer. *Cancer* 12:656–662.
- Sauter C (1964) Psammoma bodies in the thyroid gland from an endemic goiter region. *Virchows Arch Pathol Anat Physiol Klin Med* 337:328–335.
- Batsakis JG, Nishiyama RH, Rich CR (1960) Microlithiasis (calcospherites) and carcinoma of the thyroid gland. *Arch Pathol* 69:493–498.
- Dargent M, Guinet P (1950) Papillary tumors of the thyroid body. *Lyon Chirurgial* 45:543–564.
- Capangiu ML, Zampi G, Rosai J (1985) Papillary thyroid carcinoma: A study of its many morphologic expressions and clinical correlates. *Pathol Annu* 20 Pt 1:1–44.
- Dyer RB, Chen MY, Zagoria RJ (1998) Abnormal calcifications in the urinary tract. *Radiographics* 18:1405–1424.
- Chen WC, et al. (2008) Mass spectroscopic characteristics of low molecular weight proteins extracted from calcium oxalate stones: Preliminary study. *J Clin Lab Anal* 22:77–85.
- Banner MP, Poilack HM (1982) Urolithiasis in the lower urinary tract. *Seminars in Roentgenology* 17:140–148.
- Fandos-Morera A, Prats-Esteve M, Tura-Soteras JM, Traveria-Cros A (1988) Breast tumors: Composition of microcalcifications. *Radiology (Easton, Pa)* 169:325–327.
- Stomper PC, Geradts J, Edge SB, Levine EG (2003) Mammographic predictors of the presence and size of invasive carcinomas associated with malignant microcalcification lesions without a mass. *Am J Roentgenol* 181:1679–1684.
- Hermann G, et al. (1988) Occult malignant breast lesions in 114 patients: Relationship to age and the presence of microcalcifications. *Radiology (Easton, Pa)* 169:321–324.
- Sutor DJ, Wooley SE (1969) X-ray diffraction studies of the composition of gallstones from English and Australian patients. *Gut* 10:681–683.
- Loria P, et al. (2005) Gallstone disease in non-alcoholic fatty liver: Prevalence and associated factors. *J Gastroenterol Hepatol* 20:1176–1184.
- Pak CY, Poindexter JR, Adams-Huet B, Pearle MS (2003) Predictive value of kidney stone composition in the detection of metabolic abnormalities. *Am J Med* 115:26–32.
- Mushtaq S, et al. (2007) Identification of myeloperoxidase, alpha-defensin and calgranulin in calcium oxalate renal stones. *Clin Chim Acta* 384:41–47.
- Stamatelou KK, Francis ME, Jones CA, Nyberg LM, Curhan GC (2003) Time trends in reported prevalence of kidney stones in the United States: 1976–1994. *Kidney Int* 63:1817–1823.
- Corut A, et al. (2006) Mutations in SLC34A2 cause pulmonary alveolar microlithiasis and are possibly associated with testicular microlithiasis. *Am J Hum Genet* 79:650–656.
- Castellana G, Gentile M, Castellana R, Fiorente P, Lamorgese V (2002) Pulmonary alveolar microlithiasis: Clinical features, evolution of the phenotype, and review of the literature. *Am J Med Genet* 111:220–224.
- Jin CX, et al. (2002) Pancreatic stone protein of pancreatic calculi in chronic calcified pancreatitis in man. *JOP: Journal of the Pancreas* 3:54–61.
- Fang WL, et al. (2007) Long-term follow-up study of surgical treatment for pancreatic stones. *Hepato-Gastroenterology* 54:246–249.
- Machiki Y, et al. (1997) Clinicopathologic study on pancreatic cancer associated with pancreatic stones. *Int J Pancreatol* 22:187–191.
- Williams MF (1999) Sialolithiasis. *Otolaryngologic Clinics of North America* 32:819–834.
- De Jong BW, et al. (2004) Raman spectroscopic analysis identifies testicular microlithiasis as intratubular hydroxyapatite. *J Urol* 171:92–96.
- Middleton WD, Teehey SA, Santillan CS (2002) Testicular microlithiasis: Prospective analysis of prevalence and associated tumor. *Radiology (Easton, Pa)* 224:425–428.
- Kim B, Winter TC, Ryu JA (2003) Testicular microlithiasis: Clinical significance and review of the literature. *European Radiology* 13:2567–2576.
- Lachmann HJ, Hawkins PN (2006) Amyloidosis and the lung. *Chronic Respiratory Disease* 3:203–214.
- Selvanayagam JB, Hawkins PN, Paul B, Myerson SG, Neubauer S (2007) Evaluation and management of the cardiac amyloidosis. *Journal of the American College of Cardiology* 50:2101–2110.

**Table S2. Identification of peptide hits in total protein analysis of extracted CA/PC proteins as determined by LC/MS/MS**

| Protein                                                        | Ions Score <sup>a</sup> | # of Peptide Matches <sup>a</sup> | Accession #  | Mass <sup>b</sup> | % Coverage <sup>a</sup> | Frequency (%) |
|----------------------------------------------------------------|-------------------------|-----------------------------------|--------------|-------------------|-------------------------|---------------|
| Lactoferrin                                                    | 3519                    | 32                                | AAA36159     | 78346             | 61                      | 8/8 (100)     |
| Myeloperoxidase                                                | 1418                    | 12                                | NP_000241    | 83815             | 21                      | 8/8 (100)     |
| S100 calcium-binding protein A9 (calprotectin)                 | 592                     | 5                                 | NP_002956    | 13234             | 67                      | 8/8 (100)     |
| S100 calcium-binding protein A8 (calprotectin)                 | 223                     | 4                                 | NP_002955    | 10828             | 39                      | 8/8 (100)     |
| Prostate specific antigen (PSA)                                | 519                     | 5                                 | AAA60193     | 28840             | 39                      | 6/8 (75)      |
| Serum albumin                                                  | 436                     | 9                                 | CAA23754     | 69321             | 18                      | 6/8 (75)      |
| Beta-hemoglobin                                                | 1041                    | 10                                | NP_000509    | 15988             | 81                      | 5/8 (63)      |
| Prostatic acid phosphatase (PAP)                               | 313                     | 5                                 | AAH08493     | 44487             | 16                      | 5/8 (63)      |
| Defensin HNP2 or HNP3 (alpha)                                  | 187                     | 2                                 | 1DFN_A       | 3490              | 60                      | 5/8 (63)      |
| N-acylsphingosine amidohydrolase (acid ceramidase) 1           | 182                     | 3                                 | BAD9650      | 44663             | 9                       | 5/8 (63)      |
| Secretory leukocyte peptidase inhibitor (SLPI)                 | 74                      | 1                                 | NP_003055    | 14316             | 9                       | 5/8 (63)      |
| Neutrophil gelatinase-associated lipocalin (NGAL, lipocalin 2) | 501                     | 4                                 | NP_005555    | 22574             | 34                      | 4/8 (50)      |
| Agrin (AGRN)                                                   | 410                     | 5                                 | NP_940978    | 214706            | 4                       | 4/8 (50)      |
| Beta-2 microglobulin                                           | 305                     | 2                                 | CAA23830     | 12791             | 29                      | 4/8 (50)      |
| Immunoglobulin heavy chain VHDJ                                | 267                     | 3                                 | CAC10223     | 41287             | 10                      | 4/8 (50)      |
| Azurocidin 1 (AZU1)                                            | 231                     | 5                                 | CAA41601     | 2691              | 34                      | 4/8 (50)      |
| Apolipoprotein D (APOD)                                        | 214                     | 2                                 | AAB32200     | 27975             | 10                      | 4/8 (50)      |
| Beta-microseminoprotein                                        | 161                     | 1                                 | 1209281A     | 10644             | 17                      | 4/8 (50)      |
| Tomoregulin (TMEFF2)                                           | 128                     | 2                                 | NP_057276    | 41401             | 6                       | 4/8 (50)      |
| Immunoglobulin kappa light chain                               | 223                     | 1                                 | AAA87674     | 23442             | 9                       | 3/8 (38)      |
| Bactericidal/permeability-increasing protein (BPI)             | 183                     | 1                                 | AAH40955     | 53846             | 3                       | 3/8 (38)      |
| Ribonuclease, RNase A family, 3 (eosinophil cationic protein)  | 149                     | 3                                 | NP_002926    | 18373             | 23                      | 3/8 (38)      |
| Cathepsin G                                                    | 124                     | 4                                 | 1CGH_A       | 25423             | 14                      | 3/8 (38)      |
| Lysozyme C                                                     | 119                     | 2                                 | P79239       | 16596             | 27                      | 3/8 (38)      |
| Complement component C3                                        | 89                      | 1                                 | AAA85332     | 187046            | <1                      | 3/8 (38)      |
| Prosaposin (PSAP)                                              | 62                      | 1                                 | CAG33027     | 58058             | 1                       | 3/8 (38)      |
| Insulin-like growth factor binding protein 5                   | 429                     | 2                                 | NP_000590    | 30550             | 14                      | 2/8 (25)      |
| Orosomucoid 1                                                  | 340                     | 3                                 | P02763       | 23497             | 21                      | 2/8 (25)      |
| Thrombospondin, type I, domain-containing 4                    | 336                     | 5                                 | NP_079093    | 112377            | 5                       | 2/8 (25)      |
| TIMP metalloproteinase inhibitor 1 (TIMP-1)                    | 251                     | 4                                 | P49061       | 23198             | 38                      | 2/8 (25)      |
| Phospholipase A2, group IIA                                    | 203                     | 1                                 | NP_000291    | 16072             | 12                      | 2/8 (25)      |
| CD177 (neutrophil-specific antigen 1)                          | 181                     | 2                                 | BAE93254     | 44296             | 9                       | 2/8 (25)      |
| Granulin                                                       | 123                     | 2                                 | AAA58617     | 63529             | 4                       | 2/8 (25)      |
| Complement component 9                                         | 120                     | 1                                 | NP_001728    | 63133             | 4                       | 2/8 (25)      |
| Growth differentiation factor 15                               | 112                     | 2                                 | Q99988       | 34147             | 10                      | 2/8 (25)      |
| Nephronectin (NPNT)                                            | 105                     | 1                                 | NP_001028219 | 61866             | 2                       | 2/8 (25)      |
| Fibronectin 1                                                  | 97                      | 2                                 | AAI17177     | 239471            | 1                       | 2/8 (25)      |
| Follistatin-like 1                                             | 96                      | 2                                 | Q62356       | 34516             | 8                       | 2/8 (25)      |
| Medullasin (elastase 2, neutrophil)                            | 91                      | 2                                 | BAA00128     | 25432             | 7                       | 2/8 (25)      |
| Prostate stem cell antigen (PSCA)                              | 77                      | 1                                 | AAQ89271     | 12474             | 14                      | 2/8 (25)      |
| Collagen, type I, alpha 1                                      | 74                      | 1                                 | AAH36531     | 138926            | 1                       | 2/8 (25)      |
| Complement component C4A                                       | 60                      | 1                                 | AAB59537     | 193541            | <1                      | 2/8 (25)      |
| Ribonuclease 4 (RNase 4)                                       | 59                      | 1                                 | AAA96750     | 13816             | 9                       | 2/8 (25)      |
| S100 calcium-binding protein A12                               | 59                      | 1                                 | NP_005612    | 10569             | 19                      | 2/8 (25)      |
| E-cadherin (uvomorulin)                                        | 53                      | 1                                 | CAA79356     | 97456             | 1                       | 2/8 (25)      |

<sup>a</sup>For multiple matches, the highest score observed in a single case is shown.

<sup>b</sup>Nominal mass (M<sub>r</sub>).

Peptide hit(s) also were observed in a single case for the following proteins: uromodulin (Tamm-Horsfall glycoprotein), annexin A2, apolipoprotein E, actin, myosin, immunoglobulin lambda light chain, immunoglobulin J chain, S100 calcium-binding protein P, vasopressin-activated calcium-mobilizing receptor-1, nurse cell scavenger receptor 2, tropomyosin 1 alpha, fast skeletal myosin alkali, ubiquitin, BAZ1B, hemoglobin alpha-1 globin chain, hemoglobin subunit delta, alpha-1-antichymotrypsin, WAP four-disulfide core domain protein 2 precursor (major epididymis-specific protein E4), carbonic anhydrase I, transmembrane protease, serine 2 (TMPRSS2), alpha 2 macroglobulin, peroxiredoxin 2, haptoglobin, eukaryotic translation elongation factor 1 alpha 1, tetraspanin 6, brain abundant, membrane-attached signal protein 1, alpha-1-antitrypsin, kallikrein 11, alpha-1-microglobulin, ceruloplasmin (ferroxidase), lectin, galactoside-binding, soluble, 3 binding protein, MMP7, LOC124220 similar to common salivary protein 1, cystatin C, plasminogen activator, tissue, chitinase 3-like 1, vitronectin, transglutaminase 4 (prostate), defensin, alpha 4 (HNP4), Golgi apparatus protein 1, GAPDH, annexin A1, complement factor I, ADAM metalloproteinase with thrombospondin type 1 motif 1, cryptic, fibulin-1.
